# Supplementary material
Source: ML conference proceedings conference paper supplement (https://aclanthology.org/D18-1167)
Supplement: Attachment [file D18-1167.Attachment.pdf]

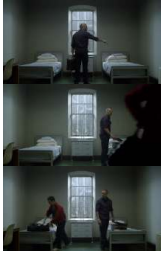

00:23.179-->00:26.307  
 (Alvie:)Yo, I don't need an escort. Get off me.  
 00:26.382-->00:28.612  
 (Alvie:)Who are you? You believe these guys?

What does Alvie say when he is being brought into the room with House ?

- a0 Go Away
- a1 Get Off Me ✓
- a2 Leave me alone
- a3 Goodbye
- a4 Hello

(a)

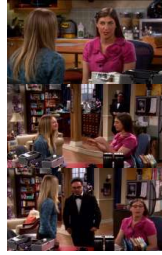

00:11.332-->00:12.958  
 (Leonard:)Aw.  
 00:13.835-->00:15.544  
 (Penny:)So handsome.  
 00:15.712-->00:16.837  
 (Penny:)Like James Bond.

What was Leonard wearing when he walked into the room with Amy , Penny and Sheldon ?

- a0 A button down shirt with a vest
- a1 A pinstriped suit
- a2 A track suit
- a3 A tuxedo ✓
- a4 A clown costume

(b)

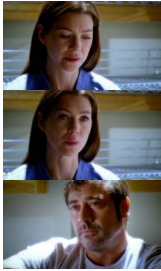

01:10.131-->01:12.292  
 (Meredith:)I was swimming.  
 01:12.367-->01:14.358  
 (Meredith:)I was fighting.  
 01:15.670-->01:18.138  
 (Meredith:)And then I thought, just for a second...

What was behind Meredith when she said she was swimming?

- a0 A painting
- a1 A couch
- a2 A metal shelf ✓
- a3 A file cabinet
- a4 A car

(c)

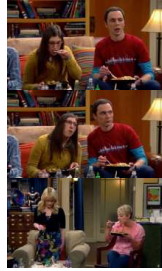

00:00.566-->00:03.700  
 (Sheldon:)I'm sensing awkwardness, am I right?  
 00:03.702-->00:05.669  
 (Howard:)Yes.  
 00:05.671-->00:07.737  
 (Sheldon:)Swish.

Where is Amy when Sheldon asks her if he is sensing awkwardness?

- a0 Amy is sitting on Penny's lap
- a1 Amy is sitting on Howard's lap
- a2 Amy is sitting on the sofa next to Sheldon ✓
- a3 Amy is standing behind Penny's chair
- a4 Amy is leaning against the front door

(d)

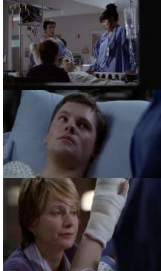

00:43.677-->00:47.875  
 (Callie:)When you put your freshly severed finger into a grungy, bacteria-filled glove,  
 00:47.948-->00:51.042  
 (Callie:)- you got a severe infection.  
 - What?

What was wrong with Heath's hand before he put it into the glove ?

- a0 He couldn't feel his fingers
- a1 His finger had been freshly severed ✓
- a2 His hands were cold
- a3 All of Heath's fingers were cut off
- a4 He had been shot in the hand

(e)

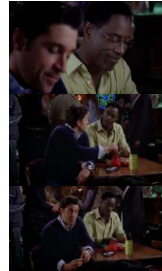

00:12.275-->00:13.640  
 (Derek:)Cristina write her vows?  
 00:13.710-->00:15.871  
 (Burke:)I guess I'll find out tomorrow.  
 00:17.413-->00:20.576  
 (Burke:)- How's Meredith doing?

Who does Burke ask Derek about when they are eating peanuts?

- a0 Burke asks about James
- a1 Burke asks about Meredith ✓
- a2 Burke asks about Addison
- a3 Burke asks about Cristina
- a4 Burke asks about Bailey

(f)

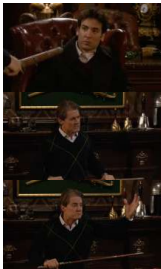

00:06.426-->00:07.778  
 (Captain:)of my betrayer is...  
 00:10.994-->00:13.644  
 (Captain:)when I tell you who it is, you're gonna...  
 00:16.674-->00:17.954  
 (Captain:)It's my doorman!

What is captain holding in his hand when he tells Ted that he believes his doorman is his betrayer ?

- a0 A mace and chain ✓
- a1 A snake
- a2 An Ax
- a3 A sword
- a4 A gun

(g)

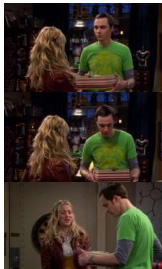

00:09.140-->00:12.980  
 (Sheldon:)Excuse me, Penny, but Doodle Jump is a game.  
 00:12.980-->00:15.650  
 (Sheldon:)Angry Birds is a game.  
 00:15.650-->00:17.110  
 (Sheldon:)World of Warcraft is a ...

How did Sheldon wear his watch when he was talking to Penny?

- a0 He was wearing it on his left wrist ✓
- a1 He was wearing it on his right wrist ✓
- a2 He didn't have a watch
- a3 He was wearing it on his left ankle
- a4 He was wearing it on his right ankle

(h)

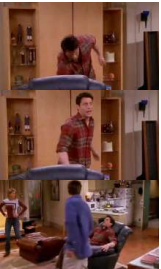

00:00.330-->00:02.382  
 I guess this chair's mine now.  
 00:05.723-->00:07.276  
 (Chandler:)Joey, you broke my chair!  
 00:07.532-->00:08.468  
 (Rachel:)Your chair?

What does Joey do when he said he guesses this chair was his ?

- a0 He sits on the chair ✓
- a1 He stands up ✓
- a2 He walks over to Chandler
- a3 He picks up the phone
- a4 He picks up a sandwich

(i)

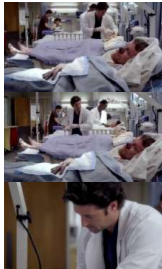

01:02.935-->01:07.372  
 (Derek:)Follow my finger. Up, down. Side to side...  
 01:07.439-->01:10.237  
 (Derek:)Good. Let me know if you can feel this, OK?

How many men were in the beds in the room when Derek and Preston were examining them?

- a0 4
- a1 2 ✓
- a2 5
- a3 3
- a4 6

(j)

Figure 4: More examples from TVQA dataset, along with the predictions from our best model. Ground truth answers are highlighted in green, and model predictions are indicated by ✓. Best viewed in color.
